# Supplementary material for: Propofol disrupts alpha dynamics in functionally distinct thalamocortical networks during loss of consciousness
Source: PubMed Central journal article supplement — Proc Natl Acad Sci U S A. 2023 Mar 10;120(11):e2207831120. doi: 10.1073/pnas.2207831120 (PMC10089159; doi:10.1073/pnas.2207831120), 2023-03-10
Supplement: pnas.2207831120.sapp.pdf [file pnas.2207831120.sapp.pdf]

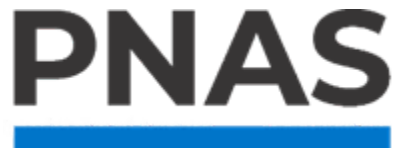

## Supplementary Information for

### Propofol disrupts alpha dynamics in functionally distinct thalamocortical networks during loss of consciousness

Veronica S. Weiner<sup>1,2+</sup>, David W. Zhou<sup>1,2,3,4+▲</sup>, Pegah Kahali<sup>2,3+◇</sup>, Emily P. Stephen<sup>2★</sup>, Robert A. Peterfreund<sup>3,5</sup>, Linda S. Aglio<sup>5,6</sup>, Michele D. Szabo<sup>3</sup>, Emad N. Eskandar<sup>5,7†</sup>, Andrés F. Salazar-Gomez<sup>3⊙</sup>, Aaron L. Sampson<sup>3▪</sup>, Sydney S. Cash<sup>4,5</sup>, Emery N. Brown<sup>1,2,3,5,8,9</sup>, Patrick L. Purdon<sup>3,5</sup>

<sup>1</sup>Department of Brain and Cognitive Sciences, Massachusetts Institute of Technology, Cambridge, MA, USA

<sup>2</sup>Picower Institute for Learning and Memory, Massachusetts Institute of Technology, Cambridge, MA, USA

<sup>3</sup>Department of Anesthesia, Critical Care and Pain Medicine, Massachusetts General Hospital, Boston, MA, USA

<sup>4</sup>Center for Neurotechnology and Recovery, Department of Neurology, Massachusetts General Hospital, Boston, MA, USA

<sup>5</sup>Harvard Medical School, Boston, MA, USA

<sup>6</sup>Department of Anesthesiology, Perioperative and Pain Medicine, Brigham and Women's Hospital, Boston, MA, USA

<sup>7</sup>Department of Neurological Surgery, Massachusetts General Hospital, Boston, MA, USA

<sup>8</sup>Division of Health Sciences and Technology, Harvard Medical School/Massachusetts Institute of Technology, Cambridge, MA, USA

<sup>9</sup>Institute of Medical Engineering and Sciences, Massachusetts Institute of Technology, Cambridge, MA, USA

▲Present address: Carney Institute for Brain Science, Brown University, Providence, RI, USA

◇Present address: Department of Neurology, Keck Medical Center, University of Southern California, Los Angeles, CA, USA

★Present address: Department of Math and Statistics, Boston University, Boston, MA, USA

†Present address: Department of Neurological Surgery, Albert Einstein College of Medicine—Montefiore Medical Center, Bronx, NY, USA

⊙Present address: Open Learning, Massachusetts Institute of Technology, Cambridge, MA, USA

▪Present address: Zanvyl Krieger Mind/Brain Institute, Johns Hopkins University, Baltimore, MD, USA

+Equal contribution

✉Correspondence: David W. Zhou, Patrick L. Purdon  
dwzhou@alum.mit.edu, patrick.purdon@mgh.harvard.edu

#### This PDF file includes:

Supplementary Tables 1-4  
Supplementary Figures 1-6  
Data Materials and Availability

## Supplementary Tables and Figures

**Supplementary Table 1. Patient demographic and clinical information.**

| Subject | Age / gender / weight, kg | Total # implanted channels | # of implanted channels analyzed | # of intracranial channels removed | Number and type of channels analyzed                          | Lengths of recordings, in seconds (time preceding LOC) | Anesthetic agents given prior to end of post-LOC epoch | Basis of LOC definition                  |
|---------|---------------------------|----------------------------|----------------------------------|------------------------------------|---------------------------------------------------------------|--------------------------------------------------------|--------------------------------------------------------|------------------------------------------|
| S1      | 21 / M / 91*              | 72                         | 72                               | 0                                  | Five strips (16x4, 8x1)                                       | 2031.56 (1875.33)                                      | Propofol, fentanyl                                     | Auditory task / LR-FNR**                 |
| S2      | 24 / F / NA***            | 72                         | 68                               | 4                                  | Two depths (8x2), four strips (32x1, 8x1, 6x2)                | 1251.88 (671.11)                                       | Propofol                                               | Auditory task / LR-FNR                   |
| S3      | 31 / F / 63               | 34                         | 34                               | 0                                  | Five depths (6x3, 8x2)                                        | 1488 (648.06)                                          | Propofol                                               | Auditory task / LR-FNR                   |
| S4      | 45 / F / 98               | 40                         | 39                               | 1                                  | Five depths (8x4, 7x1)                                        | 934 (514.16)                                           | Propofol, fentanyl, sevoflurane, nitrous oxide         | Auditory task / LR-FNR                   |
| S5      | 22 / M / 65               | 124                        | 119                              | 5                                  | Five depths (8x5), one grid (60), four strips (8x1, 4x3)      | 970.08 (379.08)                                        | Propofol, fentanyl, isoflurane, nitrous oxide          | Auditory task / LR-FNR                   |
| S6      | 52 / F / 65               | 96                         | 92                               | 4                                  | Two depths (8x2), one grid (61), four strips (4x3, 3x1)       | 2659.60 (2106.19)                                      | Propofol, fentanyl                                     | Auditory task / LR-FNR                   |
| S7      | 19 / M / 70               | 112                        | 111                              | 1                                  | Four depths (8x2, 6x2), one grid (64), four strips (4x2, 3x1) | 1435 (847.18)                                          | Propofol, remifentanyl                                 | Auditory task / LR-FNR                   |
| S8      | 29 / M / 136              | 80                         | 75                               | 5                                  | Ten depths (8x6, 7x3, 6x1)                                    | 1461.70 (970)                                          | Propofol, fentanyl, desflurane                         | Auditory task / LR-FNR                   |
| S9      | 35 / M / 73               | 80                         | 75                               | 5                                  | Ten depths (8x5, 7x5)                                         | 737.05 (462)                                           | Propofol                                               | Did not participate / Bolus + 15 seconds |
| S10     | 32 / M / 67               | 112                        | 112                              | 0                                  | Four depths (8x4), one grid (64), three strips (8x1, 4x2)     | 831.86 (380)                                           | Propofol, nitrous oxide                                | Did not participate / Bolus + 15 seconds |
| S11     | 23 / F / 59               | 100                        | 100                              | 0                                  | Three depths (8x1, 6x2), one grid (64), four strips (4x3)     | 819.66 (395.14)                                        | Propofol, fentanyl                                     | Auditory task / LR-FNR                   |

\* weight taken after surgery date

\*\* LR-FNR = Halfway between last response and first non-response to behavioral task

\*\*\* NA = Not available

**Supplementary Table 2. Patient-specific analysis metadata.**

| Subject | Length of pre-LOC coherence analysis epochs in seconds | Length of post-LOC coherence analysis epochs in seconds | Percent variance explained in top three pre-LOC principal component (bootstrap median, IQR) | Percent variance explained in top three post-LOC principal component (bootstrap median, IQR) |
|---------|--------------------------------------------------------|---------------------------------------------------------|---------------------------------------------------------------------------------------------|----------------------------------------------------------------------------------------------|
| S1      | 345.77                                                 | 71.97                                                   | 38.87, 2.43                                                                                 | 55.26, 21.41                                                                                 |
| S2      | 150.00                                                 | 419.00                                                  | 42.47, 2.33                                                                                 | 40.12, 1.22                                                                                  |
| S3      | 461.46                                                 | 118.90                                                  | 71.56, 1.37                                                                                 | 68.74, 2.31                                                                                  |
| S4      | 503.17                                                 | 100.00                                                  | 63.75, 1.36                                                                                 | 78.23, 5.47                                                                                  |
| S5      | 258.08                                                 | 190.80                                                  | 38.26, 2.753                                                                                | 33.00, 2.60                                                                                  |
| S6      | 150.00                                                 | 103.80                                                  | 23.26, 1.50                                                                                 | 20.9, 1.18                                                                                   |
| S7      | 100.00                                                 | 475.91                                                  | 28.56, 1.53                                                                                 | 23.10, 0.98                                                                                  |
| S8      | 410.80                                                 | 324.30                                                  | 38.97, 1.79                                                                                 | 54.74, 1.87                                                                                  |
| S9      | 377.90                                                 | 197.80                                                  | 46.39, 1.40                                                                                 | 76.41, 2.50                                                                                  |
| S10     | 44.20                                                  | 150.00                                                  | 42.41, 14.08                                                                                | 54.35, 6.20                                                                                  |
| S11     | 195.14                                                 | 101.00                                                  | 19.57, 0.76                                                                                 | 29.79, 1.59                                                                                  |

**Supplementary Table 3. Categorization of structural regions and labels**

| Structural region category       | Freesurfer structural labels                                                |
|----------------------------------|-----------------------------------------------------------------------------|
| anterior cingulate               | rostral anterior, caudal anterior                                           |
| posterior + isthmus of cingulate | posterior gyri, isthmus of                                                  |
| superior frontal + pole          | frontal pole and superior frontal gyrus                                     |
| orbitofrontal                    | medial and lateral orbitofrontal cortex                                     |
| inferior frontal                 | pars orbitalis, pars opercularis, pars triangularis                         |
| precentral                       | precentral gyrus                                                            |
| middle frontal                   | middle frontal gyrus                                                        |
| medial temporal + pole           | temporal pole, hippocampus, parahippocampal, entorhinal cortices            |
| inferior temporal                | inferior temporal gyrus                                                     |
| superior temporal                | superior temporal gyrus                                                     |
| parietal                         | superior and inferior parietal lobules                                      |
| middle temporal                  | middle temporal gyrus                                                       |
| postcentral                      | postcentral gyrus                                                           |
| occipital                        | superior occipital cortex, precuneus, pericalcarine, fusiform, lingual gyri |

#### Supplementary Table 4. Human Connectome Project matches

| Subject | Human Connectome Project matched subject IDs |
|---------|----------------------------------------------|
| S1      | 107422, 187850, 573451                       |
| S2      | 140925, 480141, 565452                       |
| S3      | 136732, 175237, 406836                       |
| S4      | 202820, 757764, 905147                       |
| S5      | 107422, 187850, 573451                       |
| S6      | 202820, 757764, 905147                       |
| S7      | 107422, 187850, 573451                       |
| S8      | 346137, 594156, 958976                       |
| S9      | 108222, 540436, 592455                       |
| S10     | 173738, 397861, 818455                       |
| S11     | 205725, 706040, 877269                       |

## Supplementary Figure 1. Patient anesthesia administration time courses

Shaded gray rows cover the start to end of each recording. Two patients did not participate in the behavioral paradigm, due to either failure to execute the task or exclusion at the request of the clinician. For these two patients, LOC was marked at 15 seconds after first propofol bolus injection.

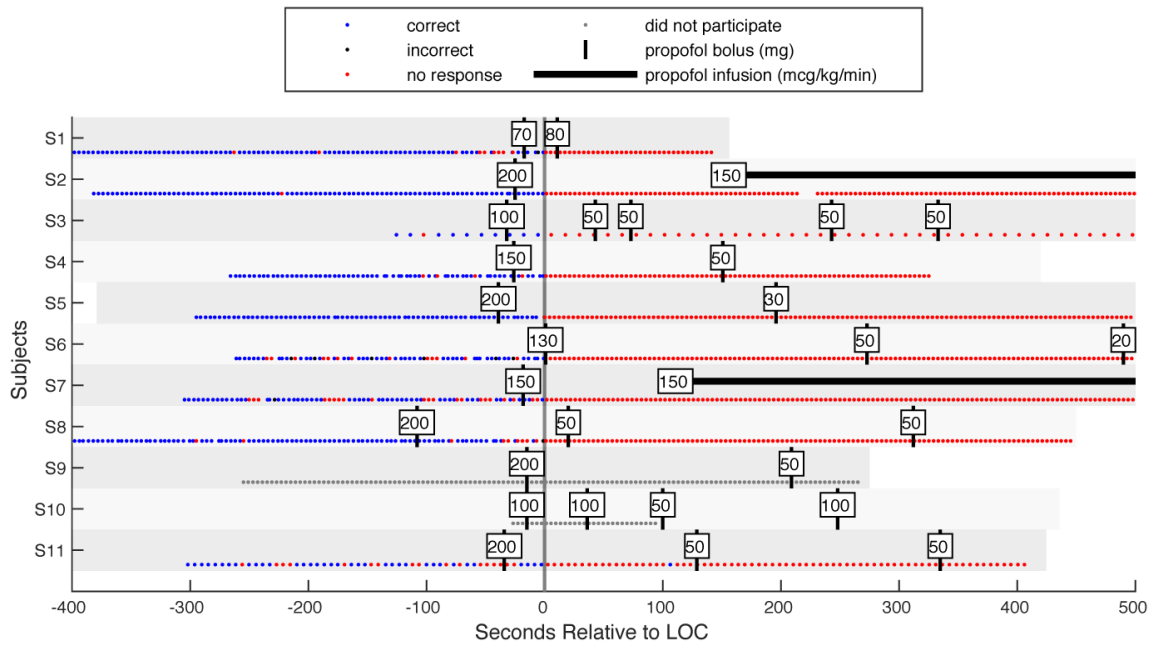

## Supplementary Figure 2. Pre- and post-LOC spectra across recorded regions.

Pre- and post-LOC multitaper spectra from all anatomical regions that contained implanted channels. Shaded boundaries represent the 95% bootstrap standard error of the mean.

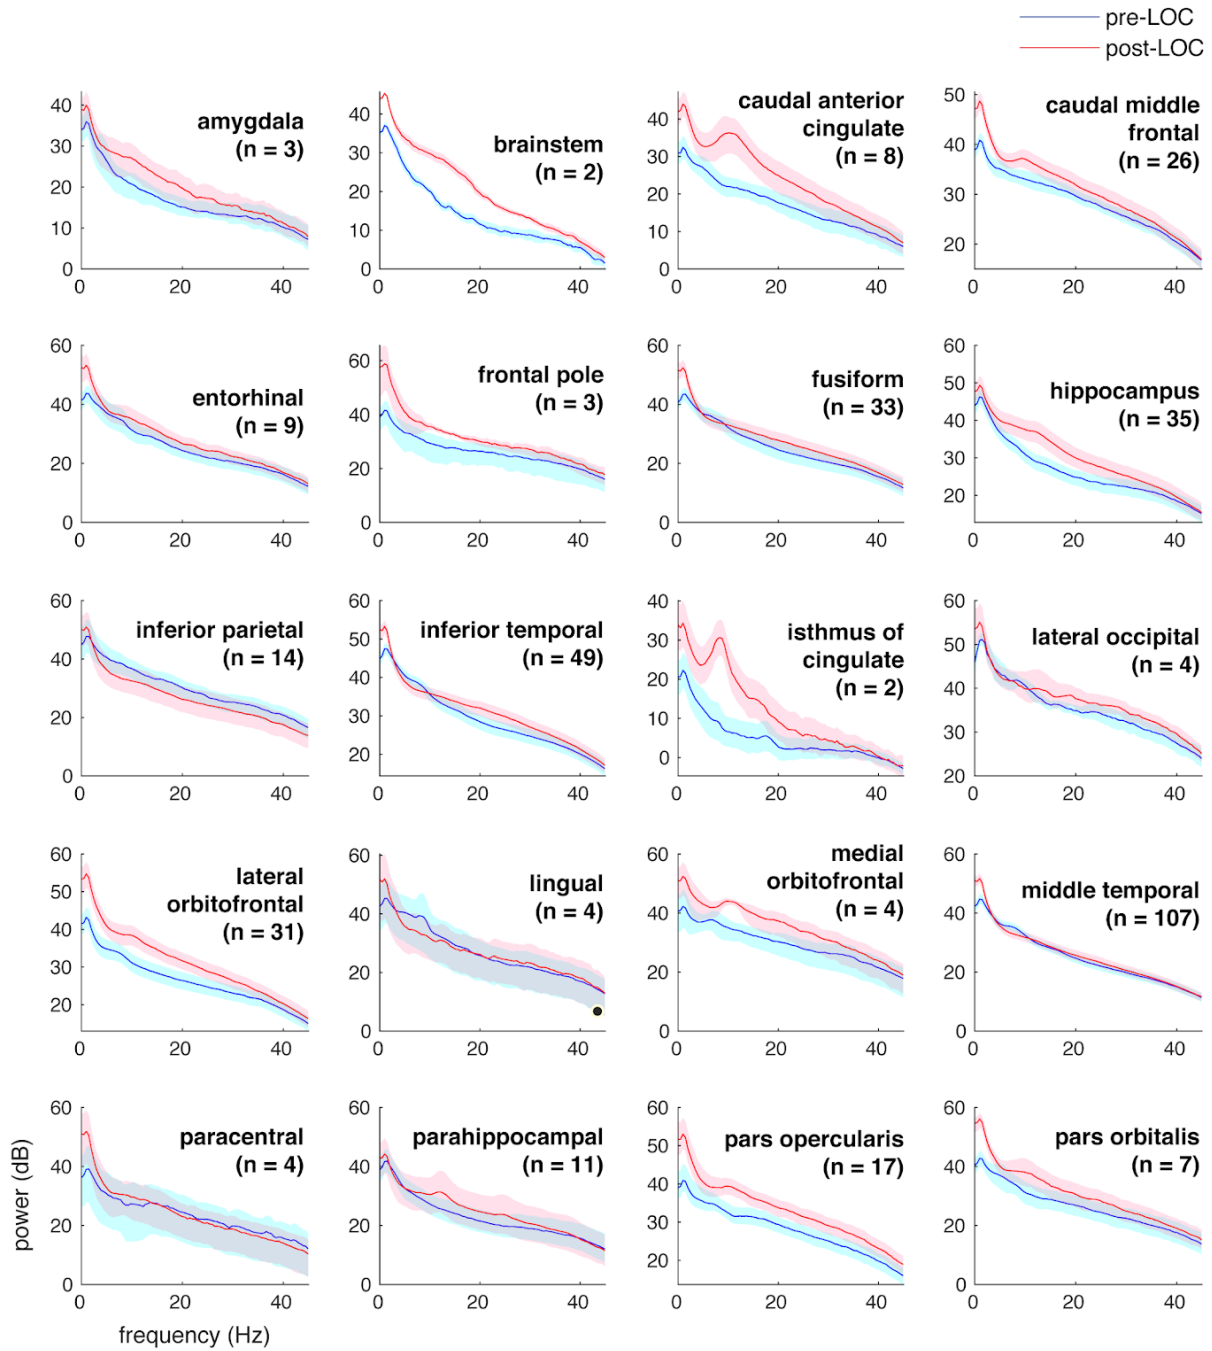

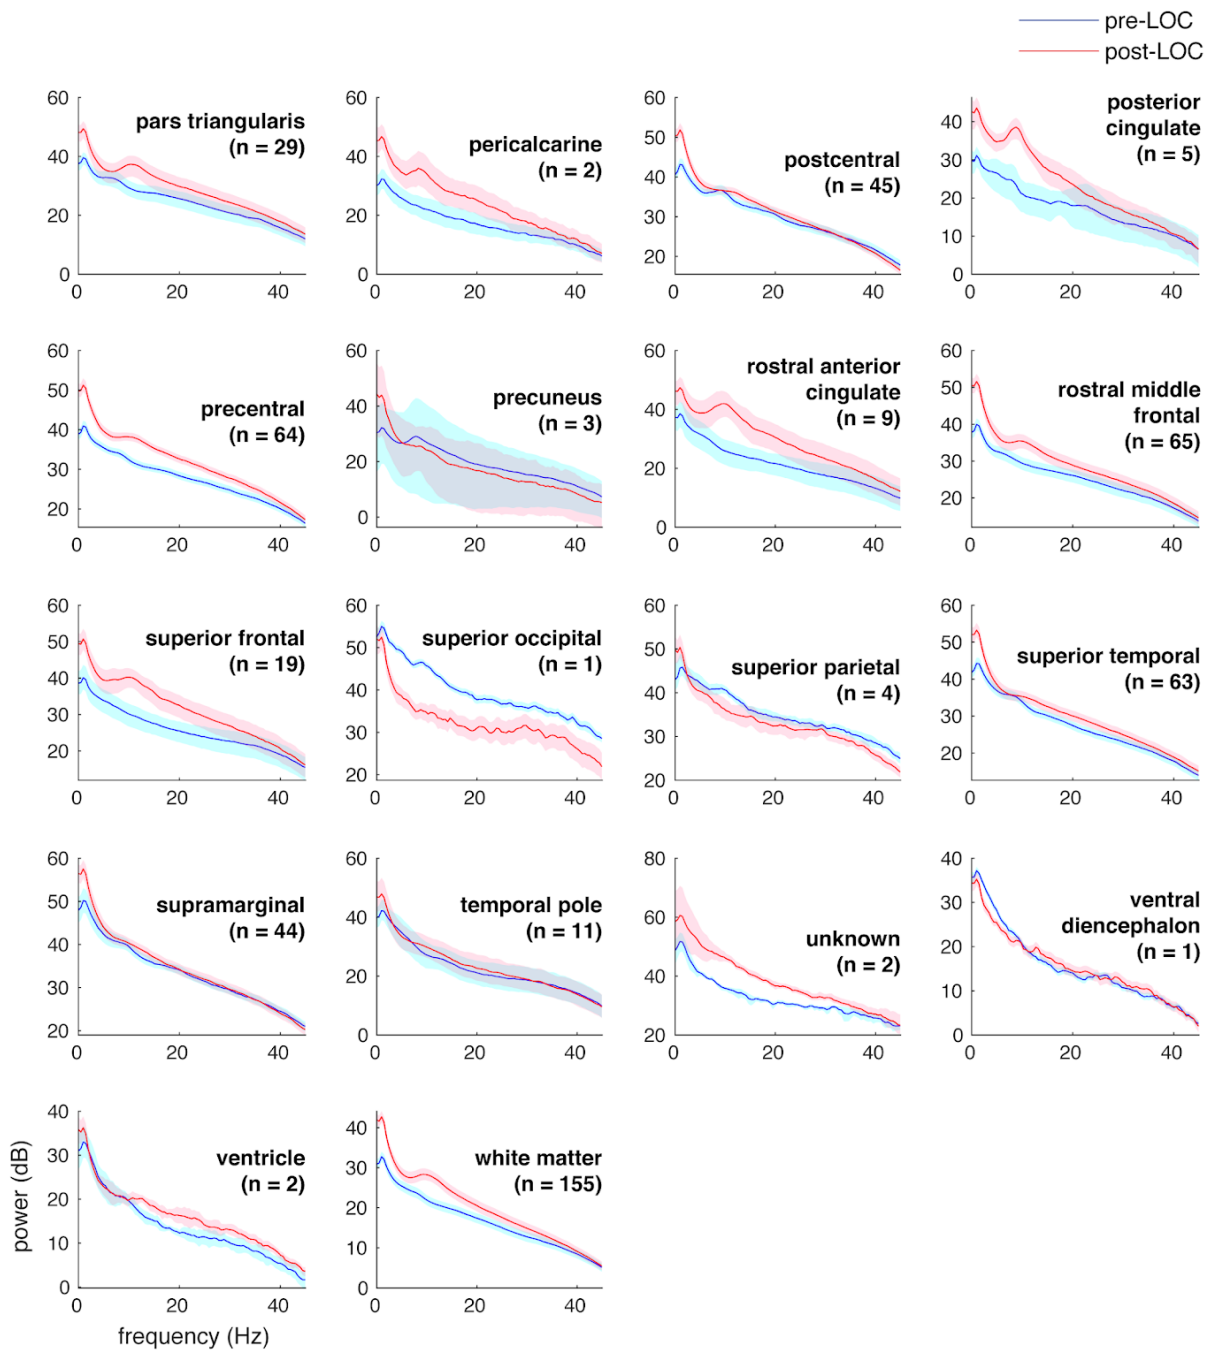



### Supplementary Figure 3. Alpha power changes across channels.

(a) Channel-wise alpha (10 Hz) multitaper spectral (left) and coherent (right) power changes between pre-LOC and post-LOC epochs from all channels in dataset, plotted in an average template brain in coronal (top), transverse (middle), and sagittal (bottom) views. Color intensities represent median bootstrap differences (similar to Figs. 2a-c) between 10-Hz multitaper spectral power in each epoch (post minus pre). (b) Channel-wise power changes in individual subjects. Each row depicts a unique subject among S1 to S11 in descending order.

a)

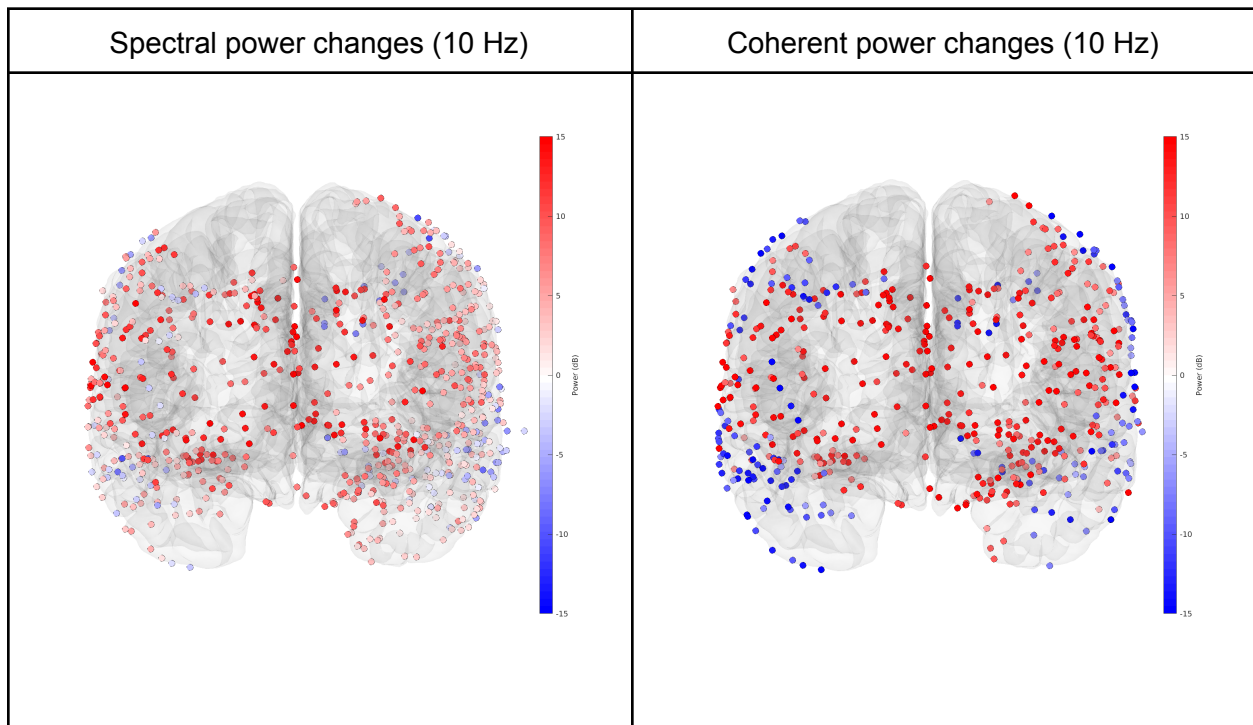

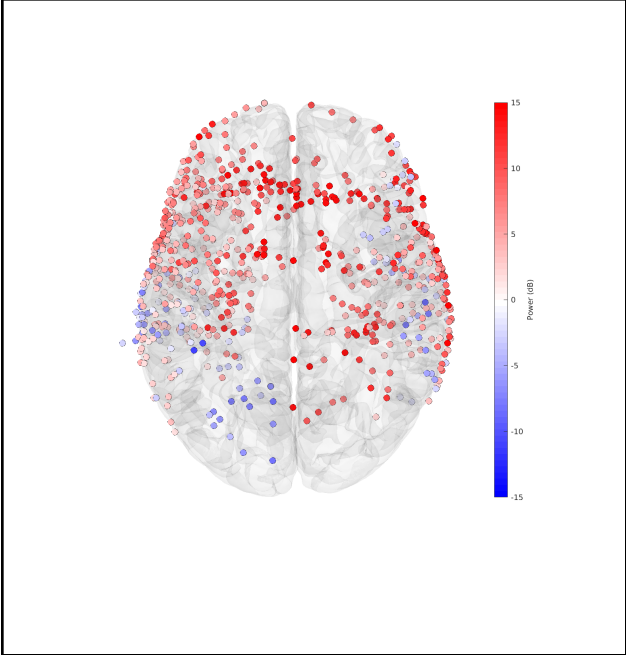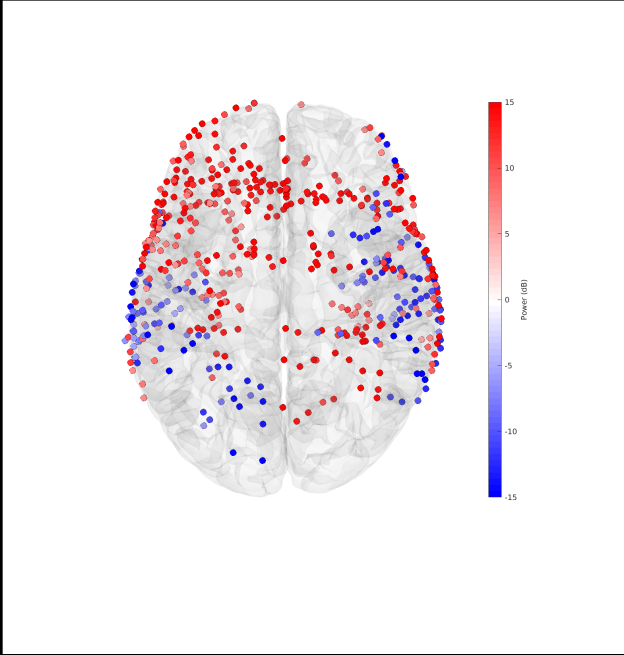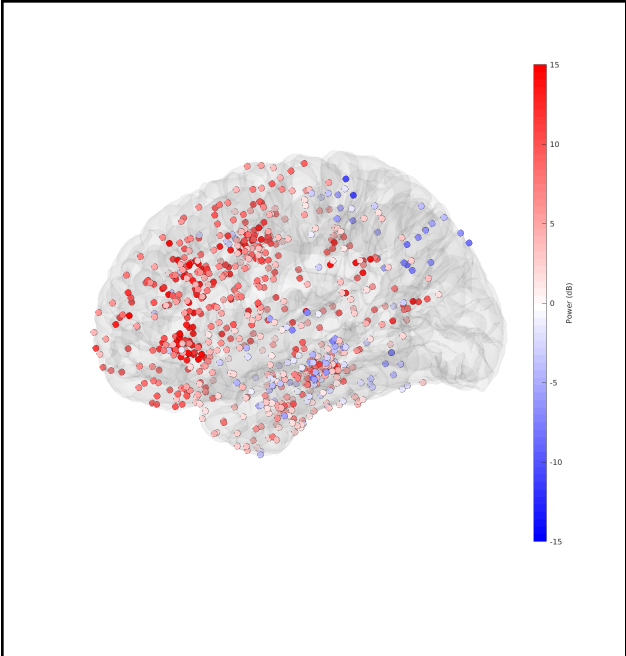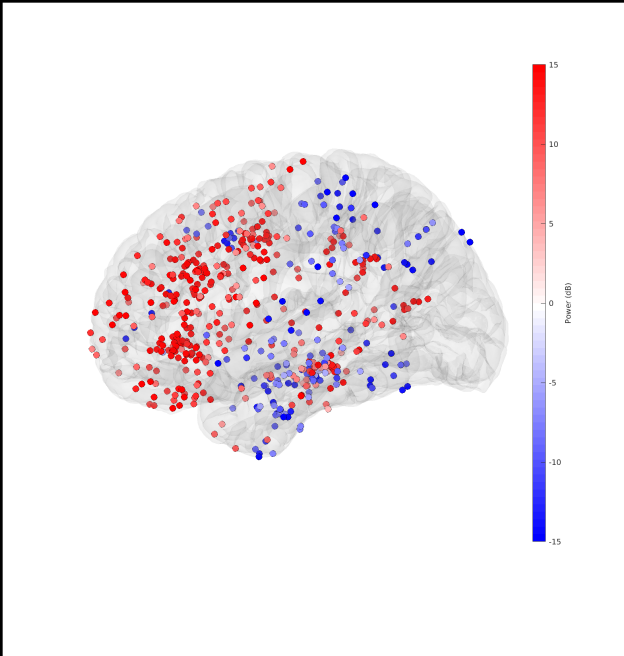

b)

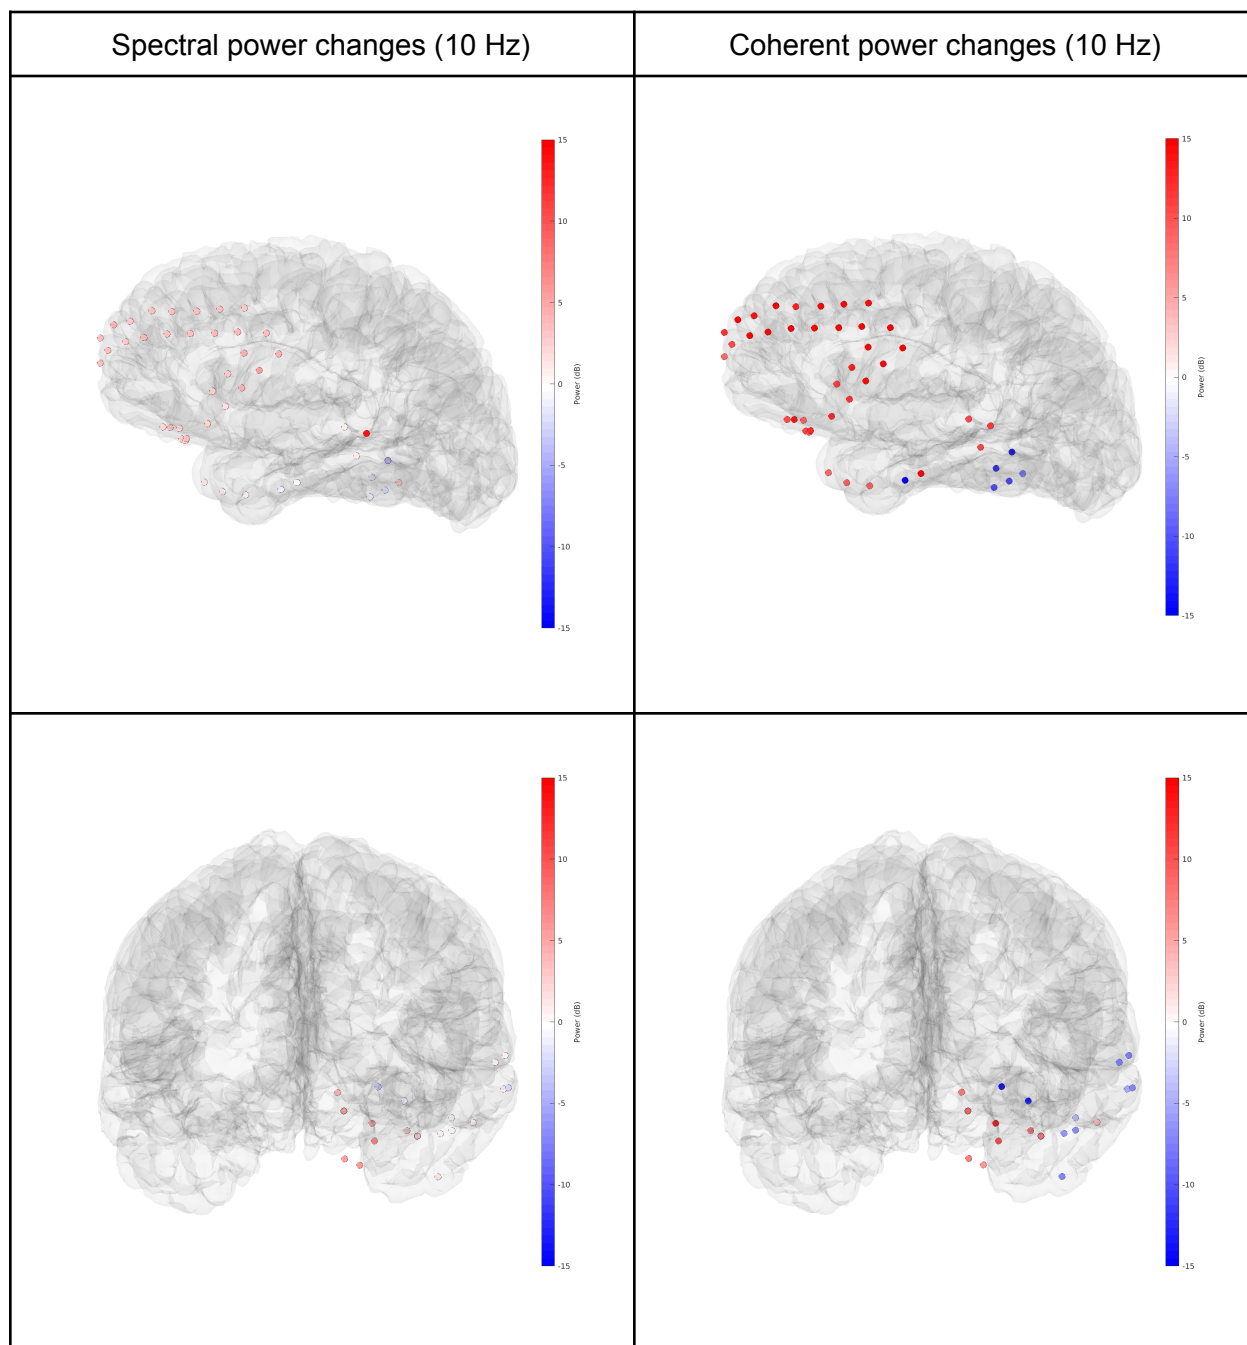

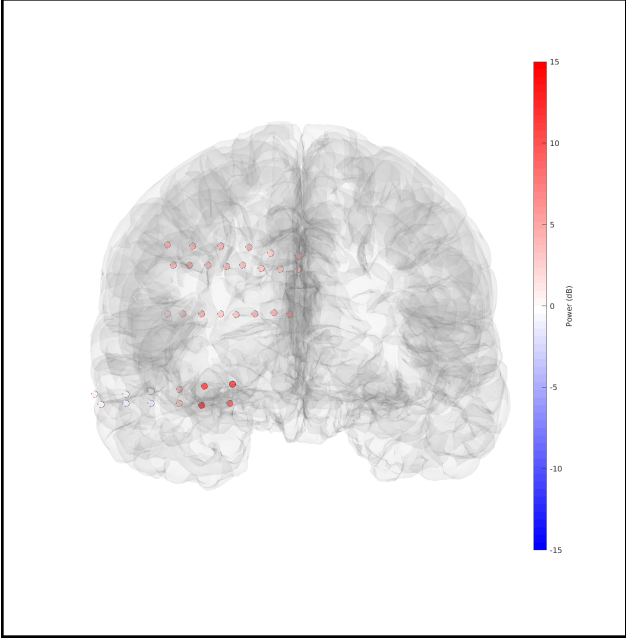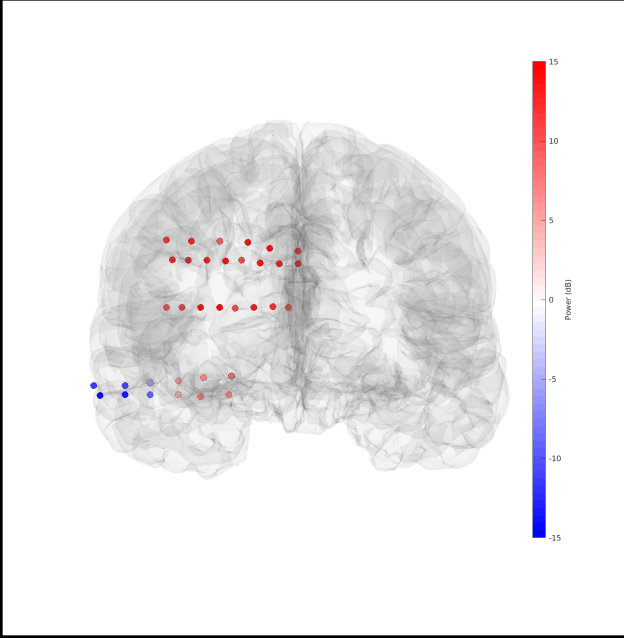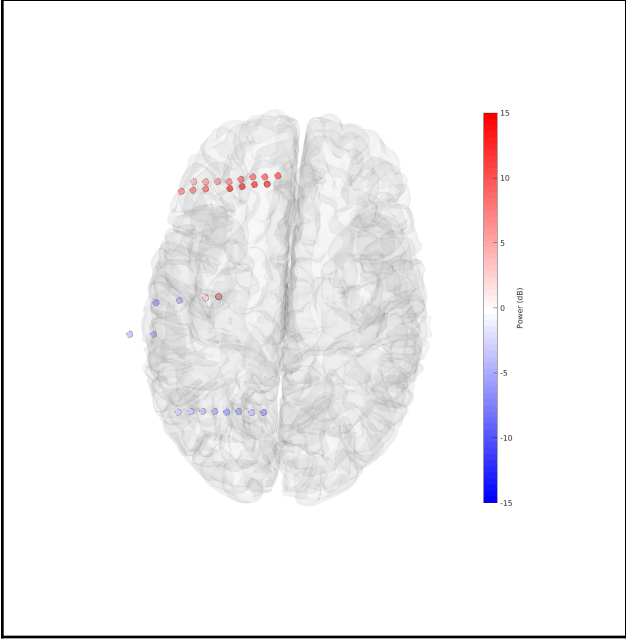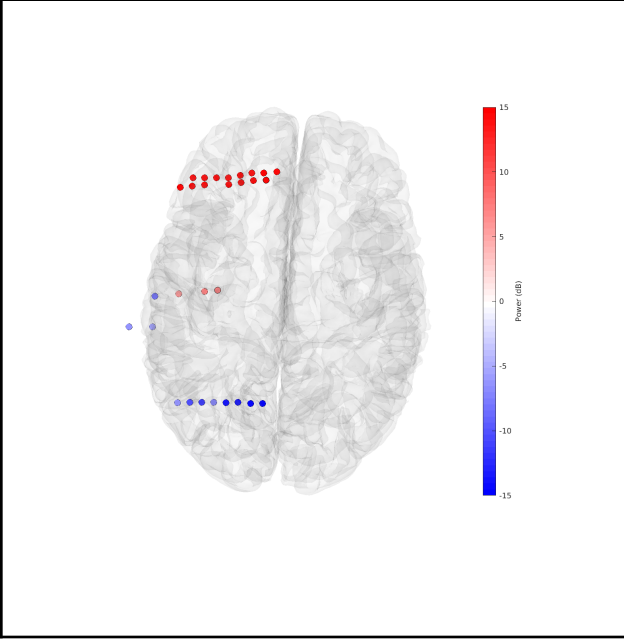

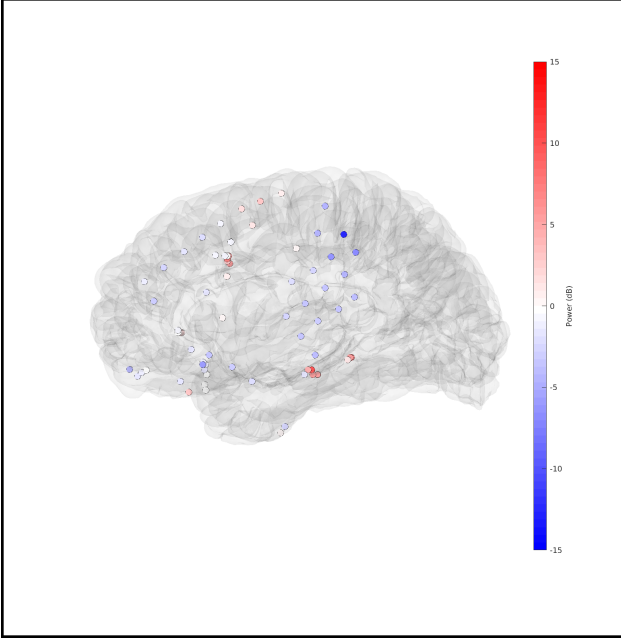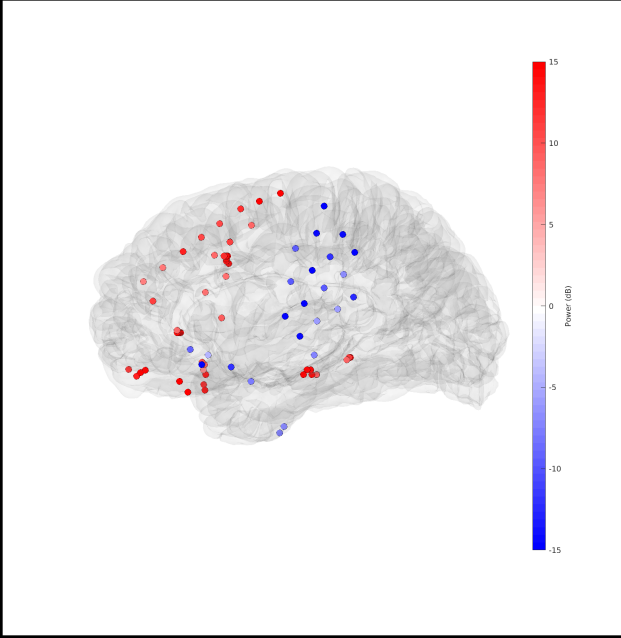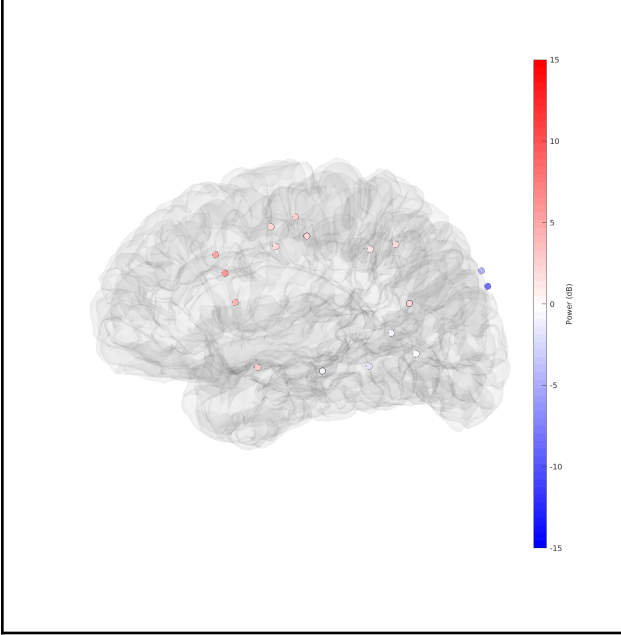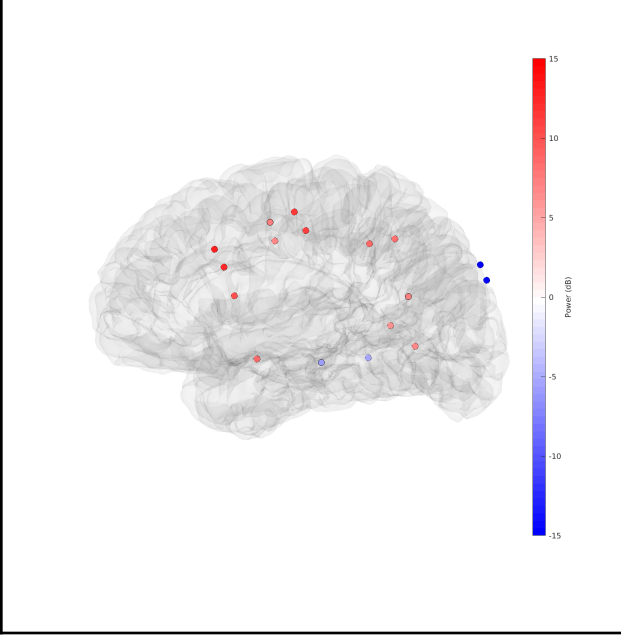

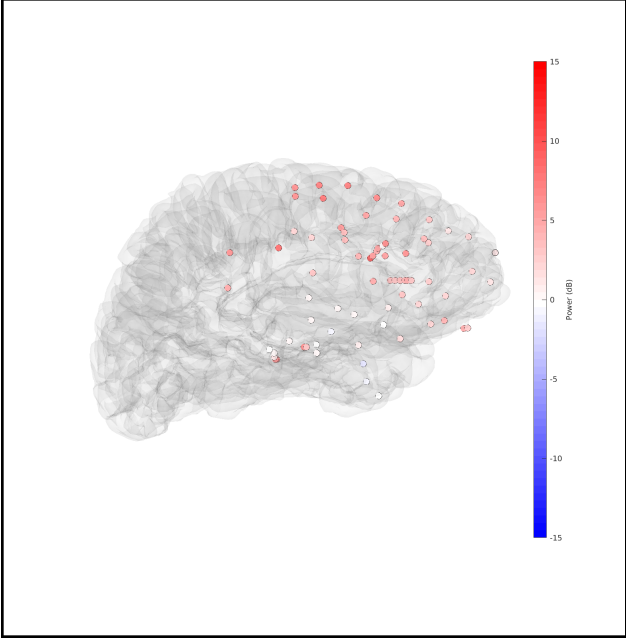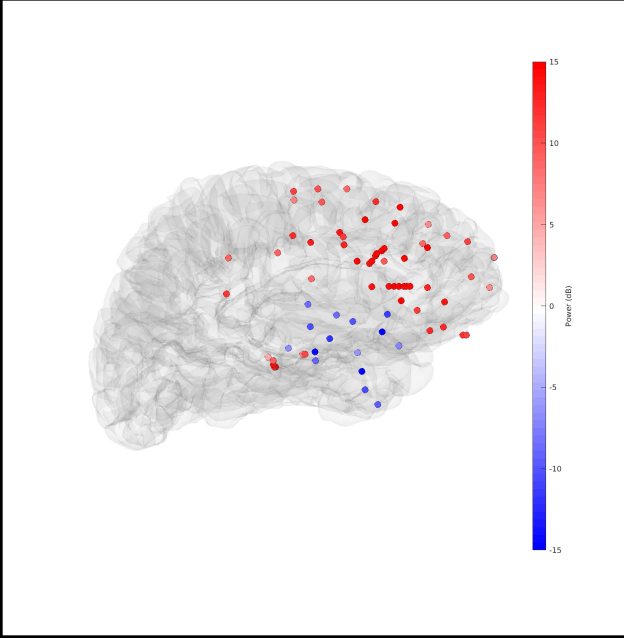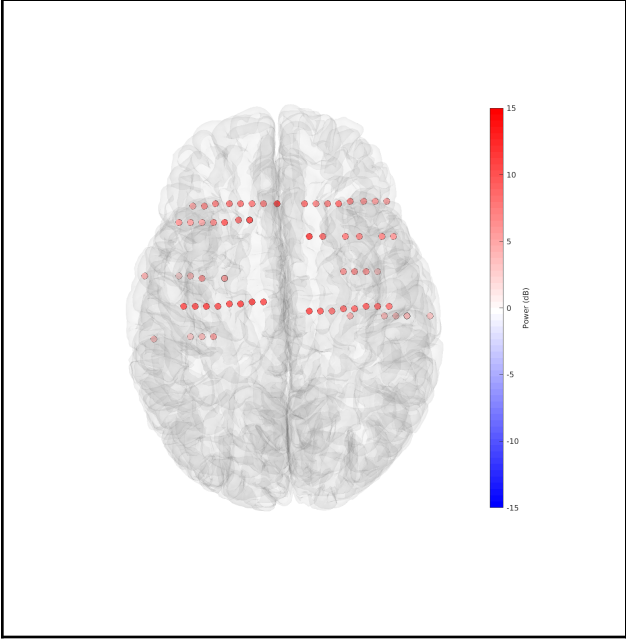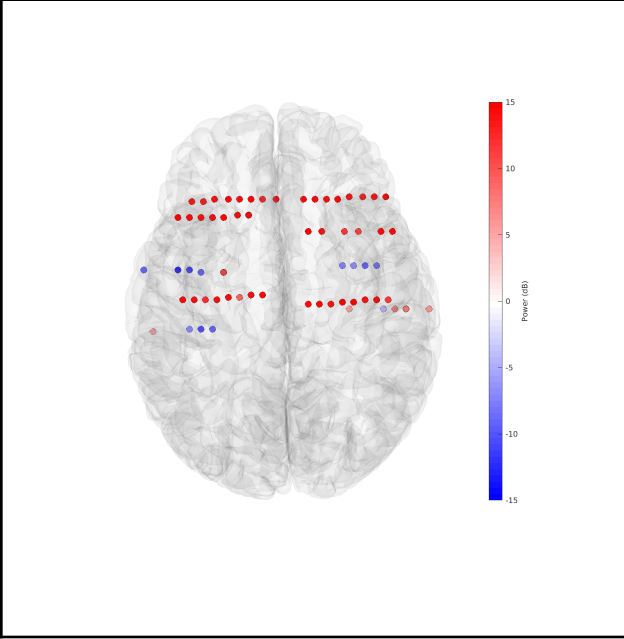

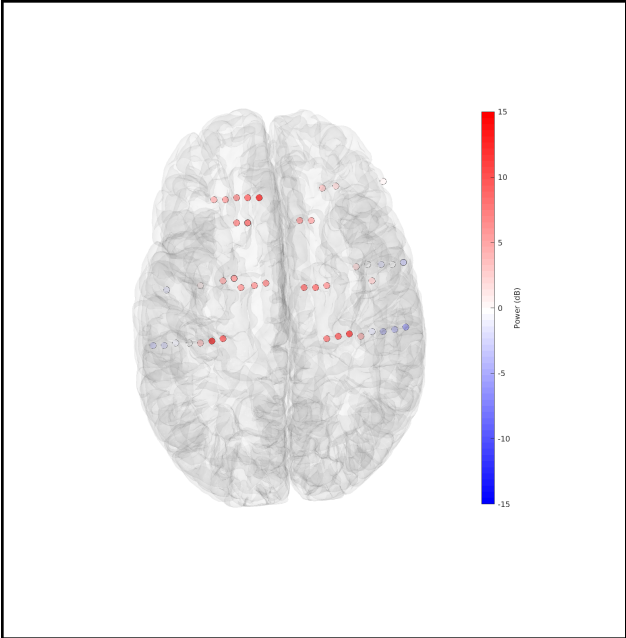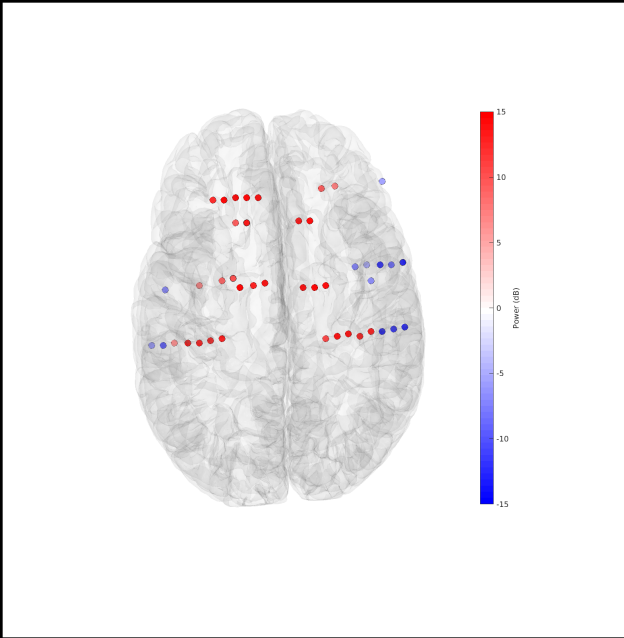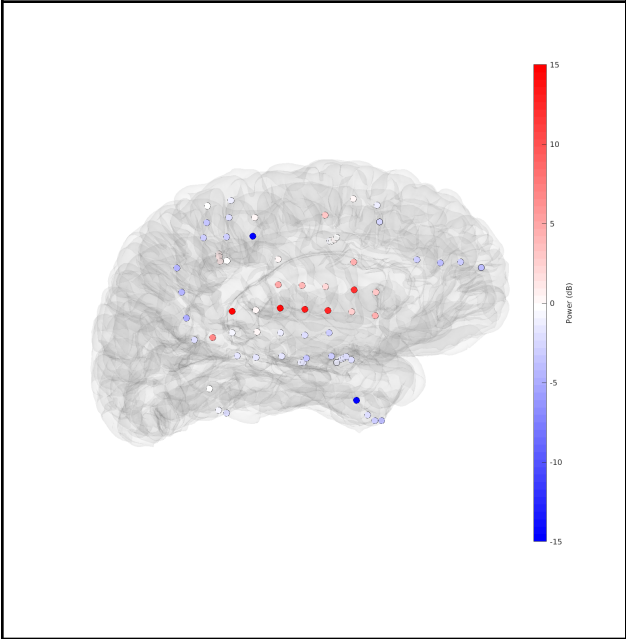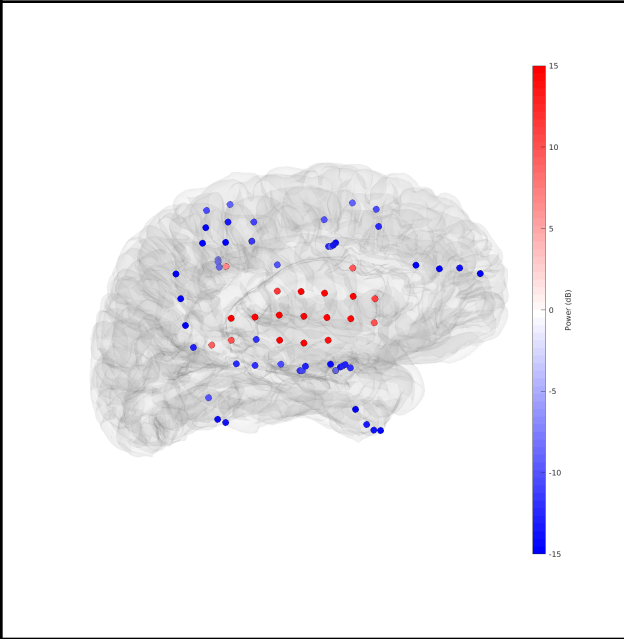

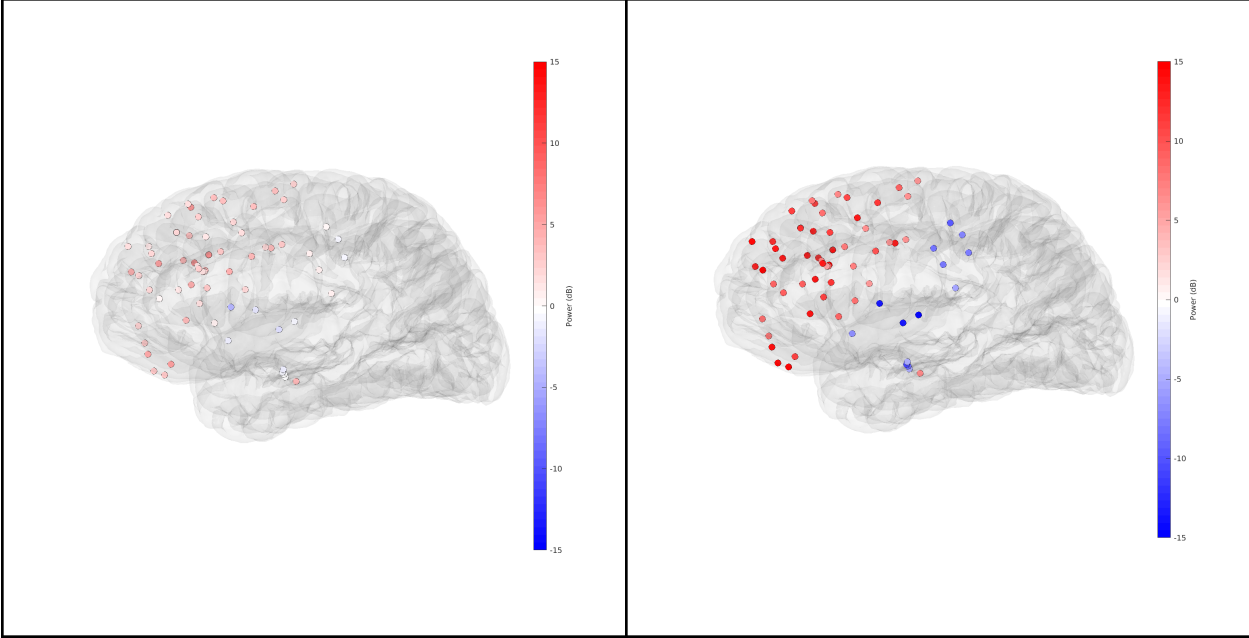



## Supplementary Figure 4. Connectivity from single exemplars of alpha-increasing and -decreasing channels.

(a) Two channels were chosen from alpha-increasing and alpha-decreasing channels as depicted in Figure 2. (b, c) Pie charts depict proportion of destinations among streamlines (total  $n = 10,000$ ) ending in the thalamus. Thalamic nucleus abbreviations: PuL = lateral pulvinar, LGN = lateral geniculate nucleus, VPL = ventral posterolateral, L-Sg = limitans-suprageniculate, PuA = anterior pulvinar, Pul = inferior pulvinar, MGN = medial geniculate nucleus, LP = lateral posterior, LD = laterodorsal, PuM = medial pulvinar, CM = centromedian, CL = central lateral, AV = anteroventral, Pf = parafascicular, VLp = posterior ventral lateral, VLa = anterior ventral lateral, MV = reuniens (medial ventral), CeM = central medial, VAmc = magnocellular ventral anterior, VA = ventral anterior, MDI = parvocellular lateral mediodorsal, MDm = magnocellular medial mediodorsal.

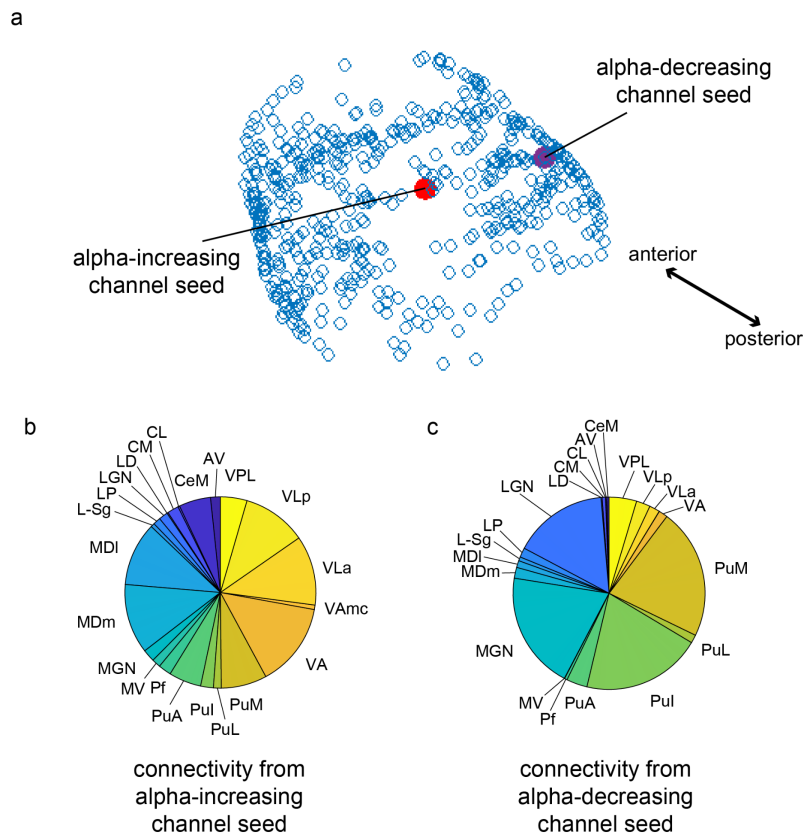

**Supplementary Figure 5. Connectivity preference under ipsilateral tractography constraints.**

Re-analysis of preferential connectivity of thalamic nuclei to alpha-increasing and -decreasing regions (Fig. 4b) using ipsilateral cortex-to-thalamus streamlines only. Gray denotes nuclei where zero effect size was within the 95% confidence interval. (See *Methods*.)

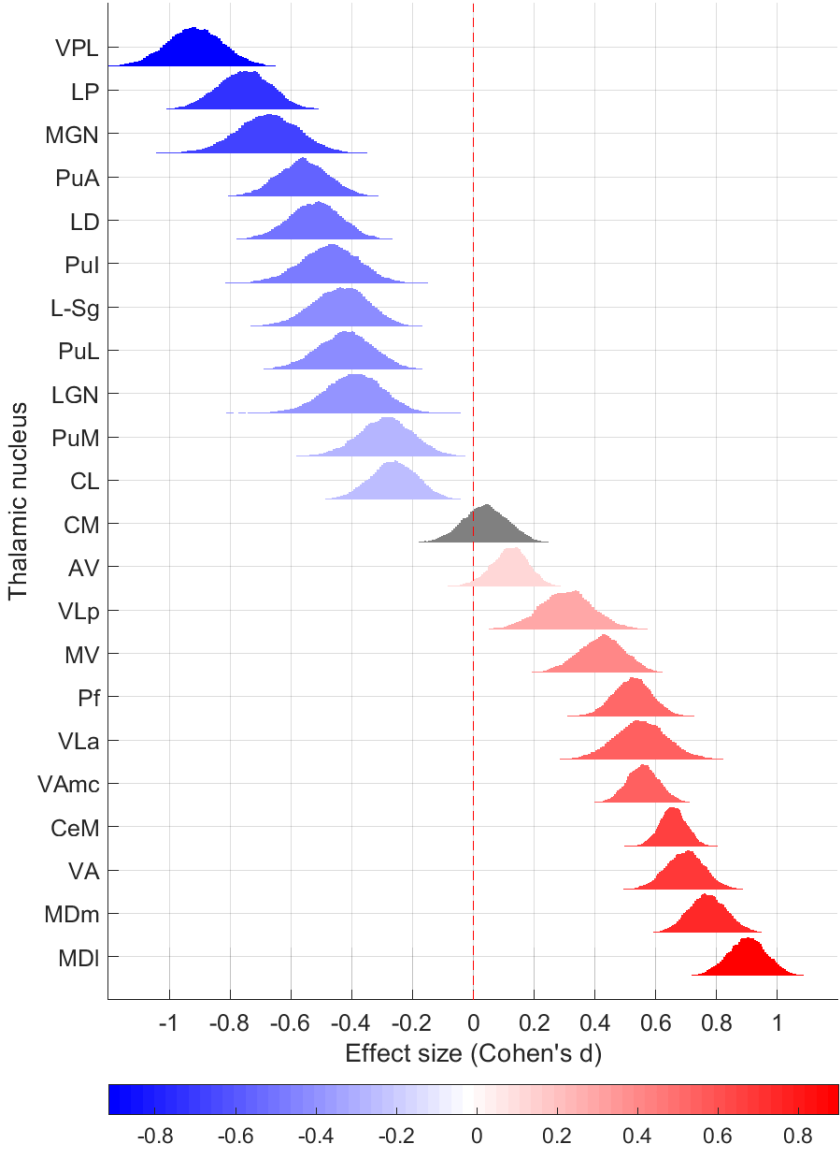

## Supplementary Figure 6. Connectivity preference under null conditions.

Preferential connectivity of thalamic nuclei to two reshuffled groups of regions. Analysis was performed under settings where contralateral tracts were allowed (a) and not allowed (b), as in the preceding figure. Gray denotes nuclei where zero effect size was within the 95% confidence interval.

a)

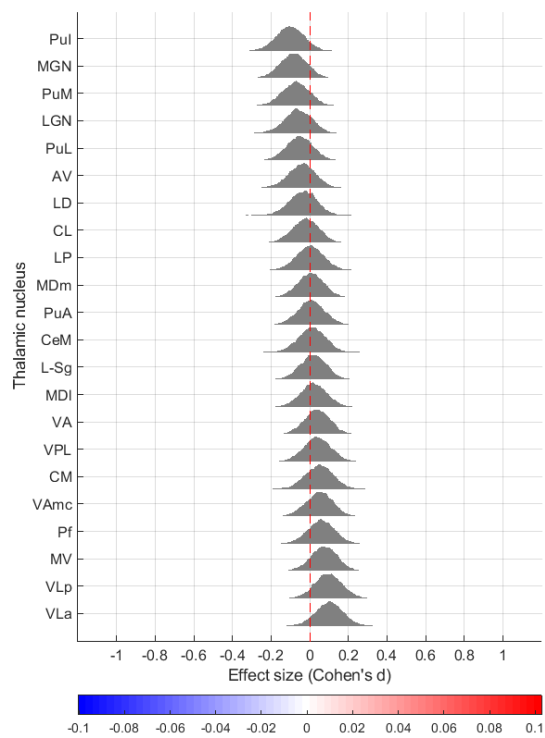

b)

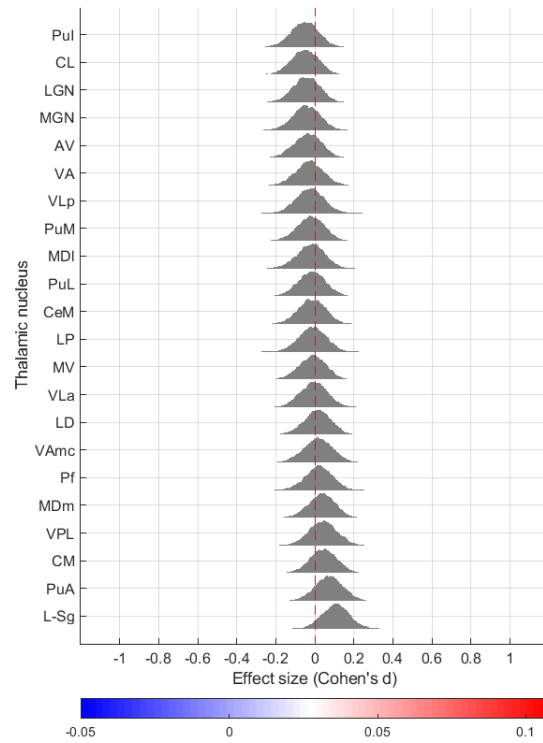

## Data Materials and Availability

Diffusion-weighted imaging data used in this study is publicly available at <https://www.humanconnectome.org/study/hcp-young-adult>. Code and data will be made available in a public repository prior to publication.
